# Supplementary material for: The Role of the pH in the Impregnation of Spherical Mesoporous Silica Particles with L-Arginine Aqueous Solutions
Source: MDPI journal article supplement (doi:10.3390/ijms222413403), 2021-12-14
Supplement: s1 [file s1]

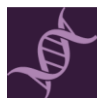

Supplementary Material

# The Role of the pH in the Impregnation of Spherical Mesoporous Silica Particles with L-Arginine Aqueous Solutions

Sara Saber Younes Mohamed <sup>1</sup>, Sonia Martinez <sup>1</sup>, Mauro Banchero <sup>1</sup>, Luigi Manna <sup>1</sup>, Silvia Ronchetti <sup>1</sup> and Barbara Onida <sup>1,\*</sup>

<sup>1</sup> Politecnico di Torino, Department of Applied Science and Technology (DISAT), Corso Duca degli Abruzzi, 24, 10129 Turin, Italy

\* Correspondence: barbara.onida@polito.it

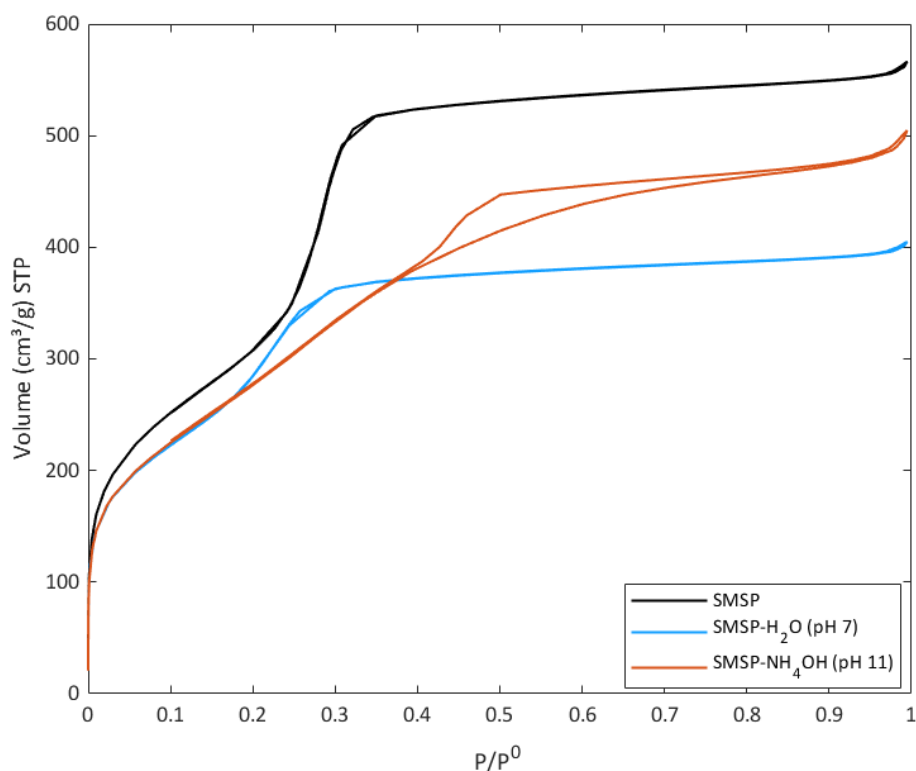

**Figure S1.** Nitrogen adsorption-desorption isotherms of SMSP, SMSP-H<sub>2</sub>O and SMSP-NH<sub>4</sub>OH.

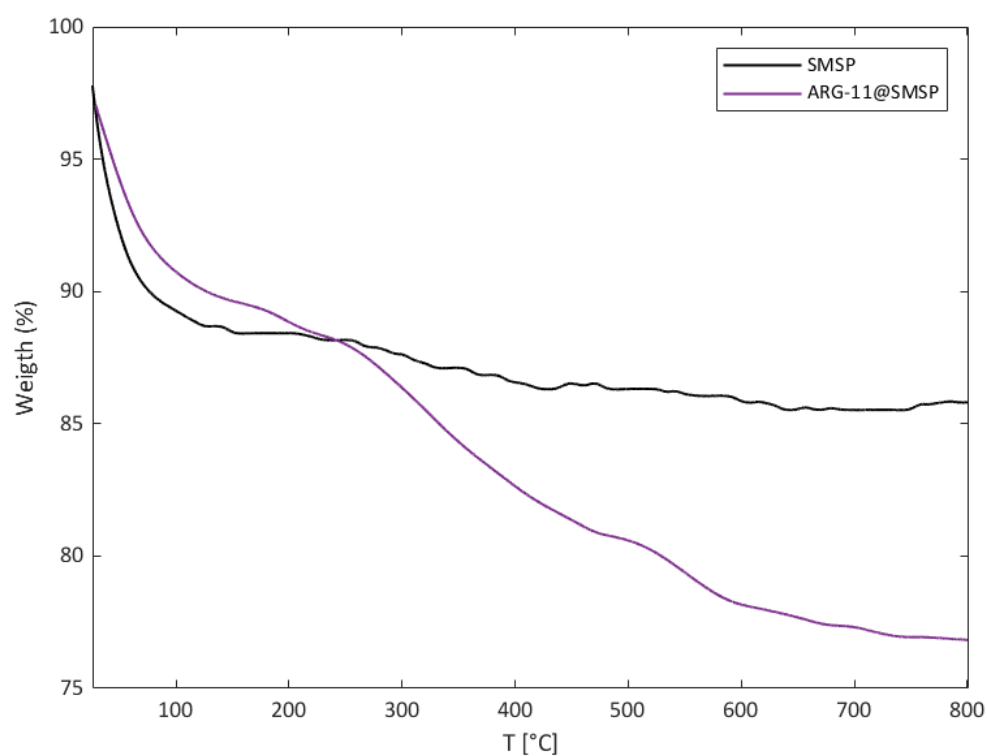

Figure S2. TGA curves of SMSP and ARG-11@SMSP (in air flow, heating rate 10 °C/min).

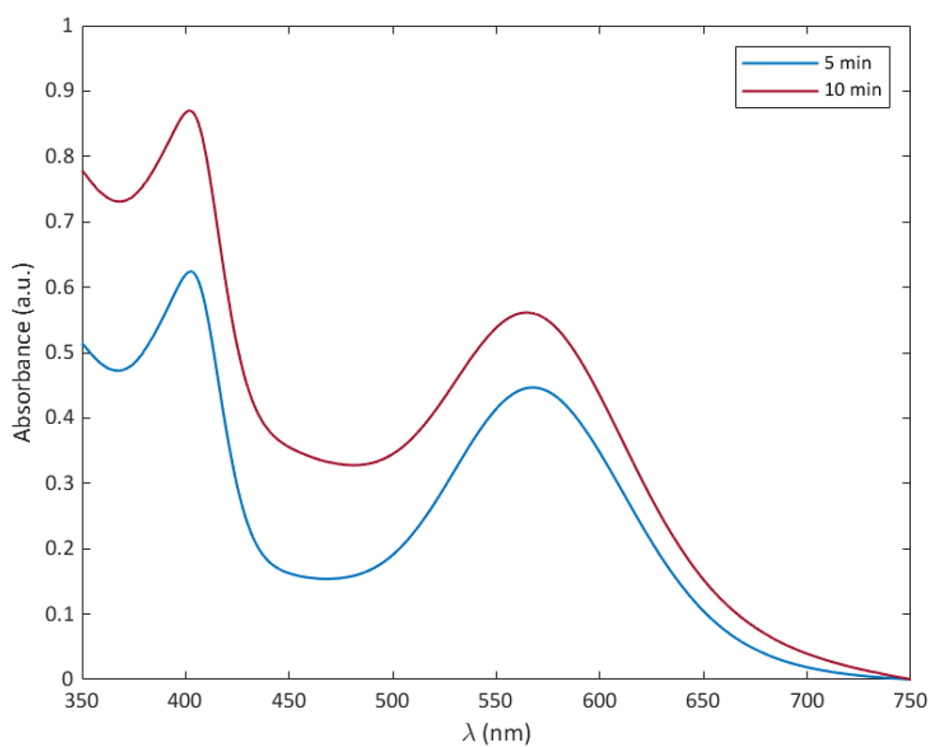

Figure S3. UV-VIS spectra of ARG solutions obtained after 5 and 10 minutes of soaking ARG-5@SMSP in water.

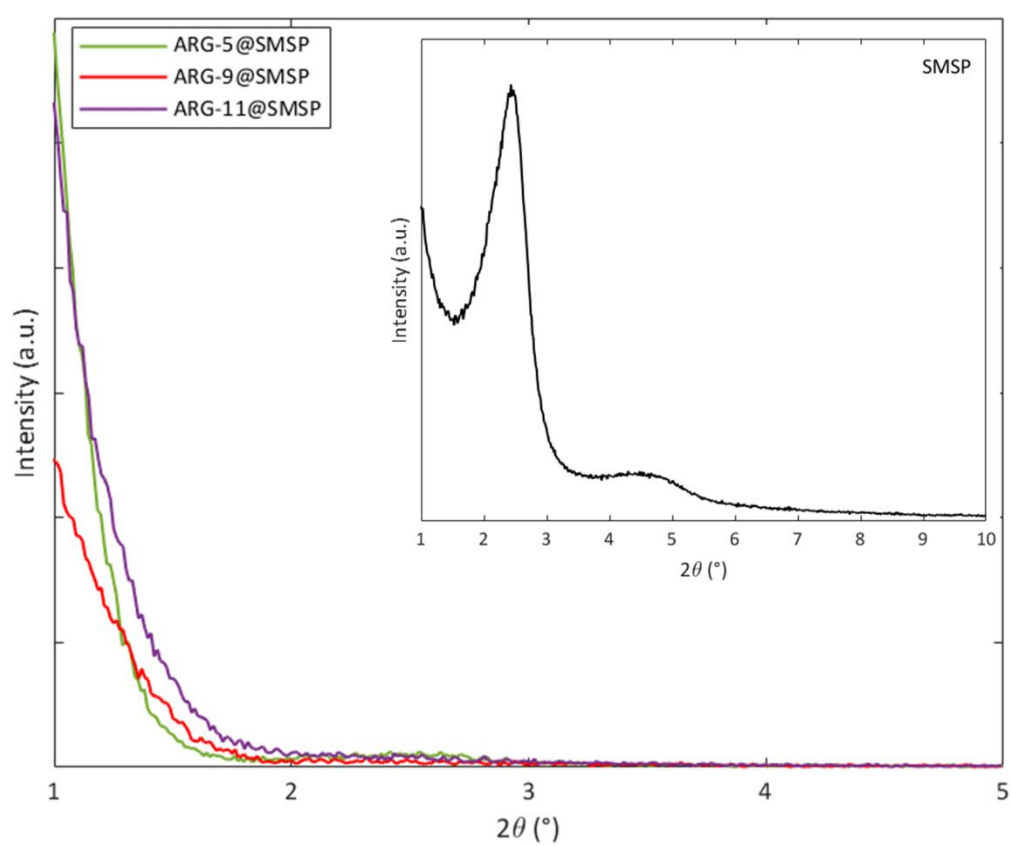

**Figure S4.** Low angle XRD patterns of SMSP (inset), ARG-5@SMSP, ARG-9@SMSP and ARG-11@SMSP.
